# Supplementary material for: Syncytiotrophoblast derived extracellular vesicles transfer functional placental miRNAs to primary human endothelial cells
Source: PubMed Central journal article supplement (PMC5496854; doi:10.1038/s41598-017-04468-0), 2017-07-04
Supplement: 41598_2017_4468_MOESM2_ESM.pdf [file 41598_2017_4468_MOESM2_ESM.pdf]

Supplementary information

**Syncytiotrophoblast derived extracellular vesicles transfer functional placental miRNAs to primary human endothelial cells**

Tina Cronqvist<sup>1\*</sup>, Dionne Tannetta<sup>2</sup>, Matthias Mörgelin<sup>3</sup>, Mattias Belting<sup>4</sup>, Ian Sargent<sup>2</sup>, Mary Familiar<sup>5,6</sup>, Stefan R. Hansson<sup>1,6</sup>

### **S1. Video, live cell confocal laser scanning microscopy**

See separate video file named S2 Supplementary video - live cell confocal laser scanning microscopy.

### **S1. Figure legend**

Using live cell confocal laser scanning microscopy, we could confirm the uptake of PKH-labelled STBEVs into the primary endothelial cells. The STBEVs appear to be localised near the nucleus at 60 min of internalization.

## S2. Table mature miRNA sequences

| Micro-RNA         | Mature micro-RNA sequence                                                                                              | Assay ID   |
|-------------------|------------------------------------------------------------------------------------------------------------------------|------------|
| hsa-miR-520e      | AAAGUGCUUCCUUUUUGAGGG                                                                                                  | 1119       |
| hsa-miR-519d #    | CAAAGUGCCUCCCUUUAGAGUG                                                                                                 | 2403       |
| hsa-miR-518d-5p   | CUCUAGAGGGAAGCACUUUCUG                                                                                                 | 2389       |
| U6 snRNA #        | GTGCTCGCTTCGGCAGCACATATACTAAAAT<br>TGGAACGATACAGAGAAGATTAGCATGGCCC<br>CTGCGCAAGGATGACACGCAAATTCGTGAAG<br>CGTTCCATATTTT | 1973       |
| hsa-miR-518e*     | CUCUAGAGGGAAGCGCUUUCUG                                                                                                 | 2371       |
| hsa-miR-520f      | AAGUGCUUCCUUUUAGAGGGUU                                                                                                 | 1120       |
| hsa-miR-516a-5p   | UUCUCGAGGAAAGAAGCACUUUC                                                                                                | 2416       |
| hsa-miR-517*      | CCUCUAGAUGGAAGCACUGUCU                                                                                                 | 1113       |
| hsa-miR-518f*     | CUCUAGAGGGAAGCACUUUCUC                                                                                                 | 2387       |
| hsa-miR-519d-5p   | CCUCCAAAGGGAAGCGCUUUCUGUU                                                                                              | 466791_mat |
| hsa-miR-525-3p    | GAAGGCGCUUCCCUUUAGAGCG                                                                                                 | 2385       |
| hsa-miR-526b*     | GAAAGUGCUUCCUUUUAGAGGC                                                                                                 | 2383       |
| hsa-miR-520b      | AAAGUGCUUCCUUUUAGAGGG                                                                                                  | 1116       |
| hsa-miR-518c      | CAAAGCGCUUCUCUUUAGAGUGU                                                                                                | 2401       |
| hsa-miR-522 #     | AAA AUGGUUCCCUUUAGAGUGU                                                                                                | 2413       |
| hsa-miR-516b      | AUCUGGAGGUAAGAAGCACUUU                                                                                                 | 1150       |
| hsa-miR-1283      | UCUACAAAGGAAAGCGCUUUCU                                                                                                 | 2890       |
| hsa-miR-520g-5p   | UCUAGAGGAAGCACUUUCUGUUU                                                                                                | 466761_mat |
| hsa-miR-519e*     | UUCUCCAAAAGGGAGCACUUUC                                                                                                 | 1166       |
| hsa-miR-518a-3p   | GAAAGCGCUUCCCUUUGCUGGA                                                                                                 | 2397       |
| hsa-miR-519c      | AAAGUGCAUCUUUUUAGAGGAU                                                                                                 | 1163       |
| hsa-miR-526b      | CUCUUGAGGGAAGCACUUUCUGU                                                                                                | 2382       |
| hsa-miR-520f-5p   | CCUCUAAAGGGAAGCGCUUUCU                                                                                                 | 466371_mat |
| hsa-miR-519b-3p   | AAAGUGCAUCCUUUUAGAGGUU                                                                                                 | 2384       |
| hsa-miR-517c #    | AUCGUGCAUCCUUUUAGAGUGU                                                                                                 | 1153       |
| hsa-miR-520c-3p # | AAAGUGCUUCCUUUUAGAGGGU                                                                                                 | 2400       |
| hsa-miR-518d      | CAAAGCGCUUCCCUUUGGAGC                                                                                                  | 1159       |
| hsa-miR-518a-5p   | CUGCAAAGGGAAGCCCUUUC                                                                                                   | 2396       |

|                   |                          |            |
|-------------------|--------------------------|------------|
| hsa-miR-520g #    | ACAAAGUGCUUCCCUUUAGAGUGU | 1121       |
| hsa-miR-516-3p #  | UGC U UCCUUCAGAGGGU      | 1149       |
| hsa-miR-520h      | ACAAAGUGCUUCCCUUUAGAGU   | 1170       |
| hsa-miR-517a #    | AUCGUGCAUCCCUUUAGAGUGU   | 2402       |
| hsa-miR-498       | UUUCAAGCCAGGGGGCGUUUUUC  | 1044       |
| hsa-miR-520d-5p # | CUACAAAGGGAAGCCCUUUC     | 2393       |
| hsa-miR-512-3p #  | AAGUGCUGUCAUAGCUGAGGUC   | 1823       |
| hsa-miR-520a*     | CUCCAGAGGGAAGUACUUUCU    | 1168       |
| hsa-miR-519e      | AAGUGCCUCCUUUUAGAGUGUU   | 2370       |
| hsa-miR-515-5p    | UUCUCCAAAAGAAAGCACUUUCUG | 1112       |
| hsa-miR-520a      | AAAGUGCUUCCCUUUGGACUGU   | 1167       |
| hsa-miR-519a #    | AAAGUGCAUCCUUUUAGAGUGU   | 2415       |
| hsa-miR-1323      | UCAAAACUGAGGGGCAUUUUCU   | 2786       |
| hsa-miR-520D-3P # | AAAGUGCUUCUCUUUGGUGGGU   | 2743       |
| hsa-miR-523       | GAACGCGCUUCCCUAUAGAGGGU  | 2386       |
| hsa-miR-521       | AACGCACUUCCCUUUAGAGUGU   | 1122       |
| hsa-miR-515-3p    | GAGUGCCUUCUUUUGGAGCGUU   | 2369       |
| hsa-miR-518e #    | AAAGCGCUUCCCUUCAGAGUG    | 2395       |
| hsa-miR-518b      | CAAAGCGCUCCCCUUUAGAGGU   | 1156       |
| hsa-miR-518c*     | UCUCUGGAGGGAAGCACUUUCUG  | 1158       |
| hsa-miR-512-5p    | CACUCAGCCUUGAGGGCACUUUC  | 1145       |
| hsa-miR-525       | CUCCAGAGGGAUGCACUUUCU    | 1174       |
| hsa-miR-518f      | GAAAGCGCUUCUCUUUAGAGG    | 2388       |
| hsa-miR-524-5p    | CUACAAAGGGAAGCACUUUCUC   | 1982       |
| hsa-miR-524       | GAAGGCGCUUCCCUUUGGAGU    | 1173       |
| hsa-miR-372       | AAAGUGCUGCGACAUUUGAGCGU  | 560        |
| hsa-miR-371b-5p   | ACUCAAAAAGAUGGCGGCACUUU  | 463886_mat |
| hsa-miR-371b-3p   | AAGUGCCCCACAGUUUGAGUGC   | 464115_mat |
| hsa-miR-371-3p    | AAGUGCCGCAUCUUUUGAGUGU   | 2124       |
| hsa-miR-373*      | ACUCAAAAUGGGGGCGCUUUC    | 562        |
| hsa-miR-372-5p    | CCUCAAAAUGUGGAGCACUAUUCU | 466501_mat |
| hsa-miR-373       | GAAGUGCUUCGAUUUUGGGGUGU  | 561        |
| hsa-miR-141*      | CAUCUCCAGUACAGUGUUGGA    | 2145       |

|               |                          |     |
|---------------|--------------------------|-----|
| hsa-miR-210 # | CUGUGCGUGUGACAGCGGCUGA   | 512 |
| hsa-miR-222 # | AGCUACAUCUGGCUACUGGGUCUC | 525 |
| hsa-miR-16 #  | UAGCAGCACGUAAAUAUUGGCG   | 391 |

# = miRNA fulfilling the criteria of Ct<35 in one or more samples in the array analysis

**S3. Heat map showing the analysis of miRNA array data, Ct values of miRNAs fulfilling expression inclusion criteria**

|                            | <b>Control<br/>cells Ct</b> | <b>Normal<br/>STBEV Ct</b> | <b>PE STBEV<br/>Ct</b> |                                               |
|----------------------------|-----------------------------|----------------------------|------------------------|-----------------------------------------------|
| hsa-miR-16-000391          | 23.444                      | 23.173                     | 23.092                 |                                               |
| hsa-miR-210-000512         | 31.172                      | 30.713                     | 30.845                 | p=0.022 comparing PE to normal                |
| hsa-miR-222-000525         | 22.642                      | 22.223                     | 22.054                 | p=0.031 comparing control to normal           |
| hsa-miR-516-3p-001149      | 33.207                      | 33.496                     | 33.492                 |                                               |
| hsa-miR-520D-3P-002743     | 30.503                      | 30.327                     | 30.164                 |                                               |
| hsa-miR-520d-5p-002393     | 32.062                      | 31.831                     | 31.488                 |                                               |
| hsa-miR-512-3p-001823      | -                           | 33.949                     | 34.25                  |                                               |
| <b>hsa-miR-517a-002402</b> | <b>35.416</b>               | <b>30.108</b>              | <b>30.619</b>          | <b>Selected for futher analysis by RTqPCR</b> |
| <b>hsa-miR-517c-001153</b> | <b>37.659</b>               | <b>31.643</b>              | <b>32.129</b>          | <b>Selected for futher analysis by RTqPCR</b> |
| hsa-miR-518e-002395        | -                           | 33.339                     | 33.688                 |                                               |
| <b>hsa-miR-519a-002415</b> | <b>37.035</b>               | <b>32.407</b>              | <b>33.122</b>          | <b>Selected for futher analysis by RTqPCR</b> |
| hsa-miR-519d-002403        | -                           | 33.068                     | 32.545                 |                                               |
| hsa-miR-520c-3p-002400     | 36.199                      | 34.289                     | 34.945                 |                                               |
| hsa-miR-520g-001121        | -                           | 34.736                     | 33.73                  |                                               |
| hsa-miR-522-002413         | 36.186                      | 34.404                     | 33.869                 |                                               |

Lowest Ct values are marked red, highest Ct values are marked green. In white are values not fulfilling the criteria of Ct<35.

**S4. Transmission electron microscopy figure characterising STBEVs**

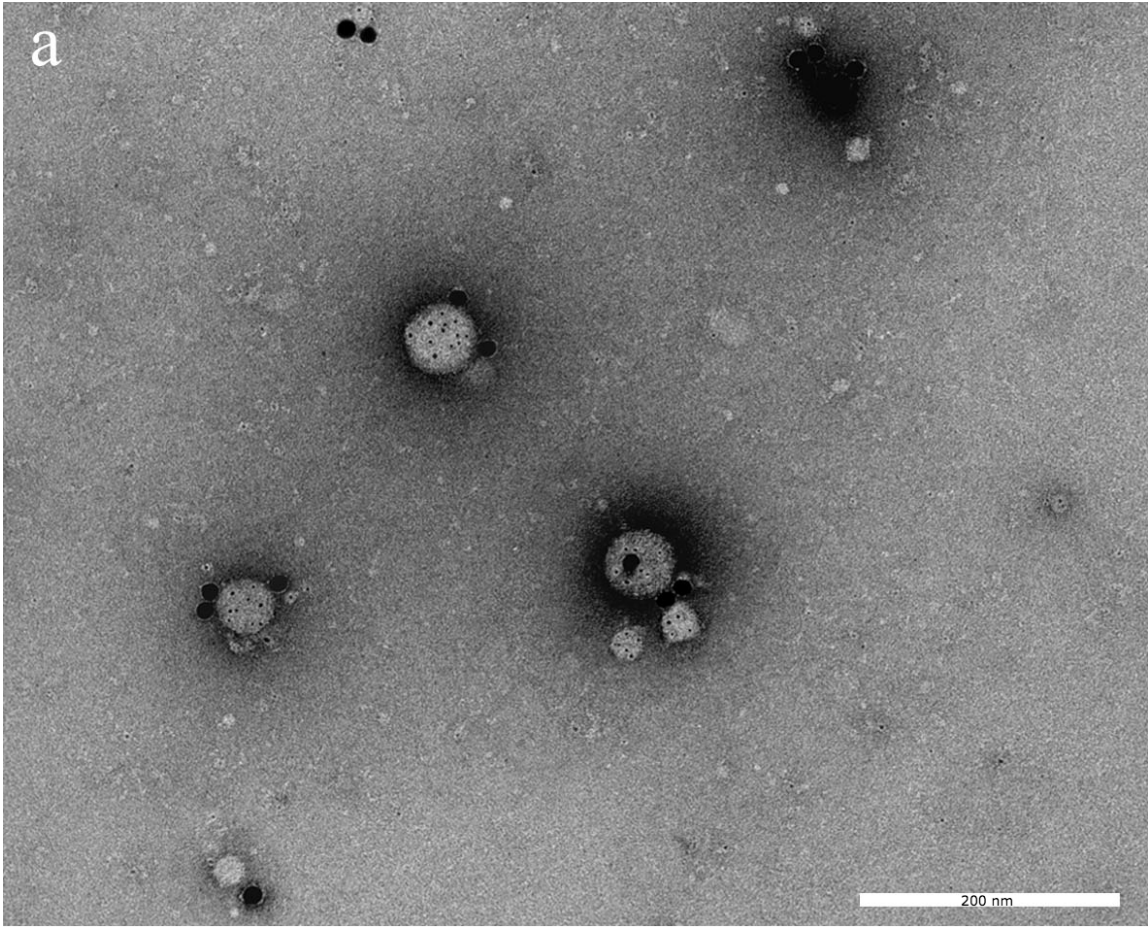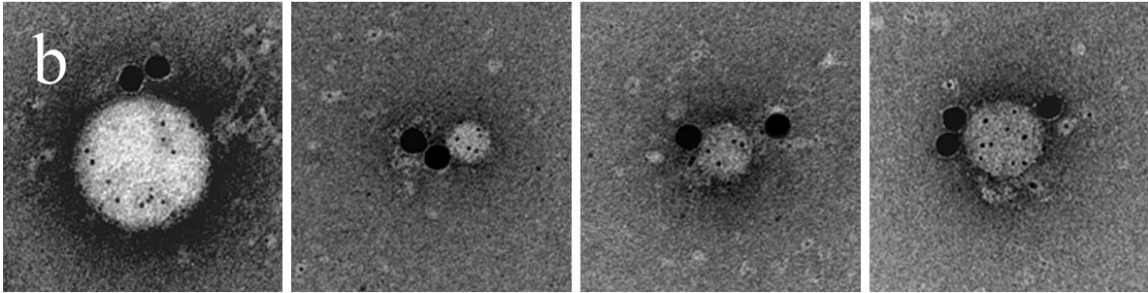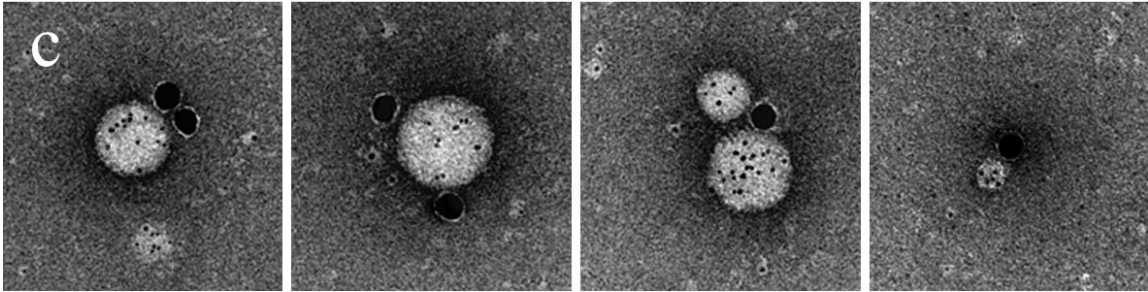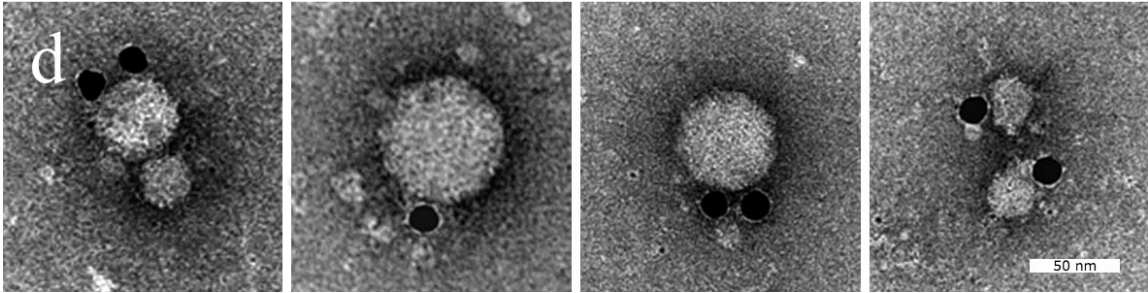

#### **S4. Figure legend**

STBEVs were visualized using transmission electron microscopy (TEM). Shown in panel (a) are PE STBEVs, treated with antibodies against PLAP and the miRNA primer against mir-517c, both labelled with colloidal gold of different sizes; 20 nm and 5 nm respectively. At higher magnification (b), PE STBEVs contained mir-517c in both PLAP positive and PLAP negative vesicles, as was also seen for normal STBEVs (data not shown). In (c) STBEVs were treated with antibodies against PLAP and HbF, labelled with colloidal gold of different sizes; 20 nm and 5 nm respectively. HbF was found inside both PLAP positive and PLAP negative PE vesicles (c). In contrast, normal STBEVs (d) were PLAP positive (20nm gold particles) but HbF negative (5nm gold particles).



## S5. Full length western blots

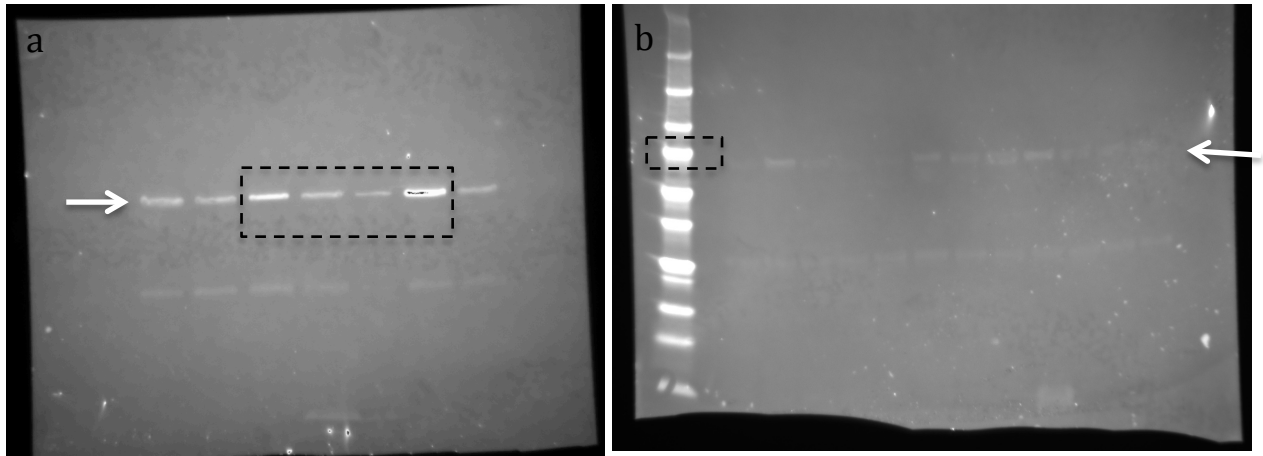

### S5. Figure legend

Full length western blots for Figure 1. Characterisation of STBEVs using NTA and western blot. In S5a, lanes 1-4 represents normal STBEV samples, lanes 5-7 represents PE STBEV samples. In S5b, lanes 1-6 represent normal STBEV samples, lanes 7-12 represent PE STBEV samples. In both S5a and S5b, PLAP bands are indicated with an arrow. Marked are the sections shown in Figure 1, cropped and inverted for better visualisation – two normal and two PE STBEV samples (S5a) as well as the molecular weight 75kDa (S5b).
